# Supplementary material
Source: Springer Nature journal article supplement (https://www.springermedizin.de/resource/supplementary/12957_2011_888_MOESM1_ESM.pdf/9565736)

1A

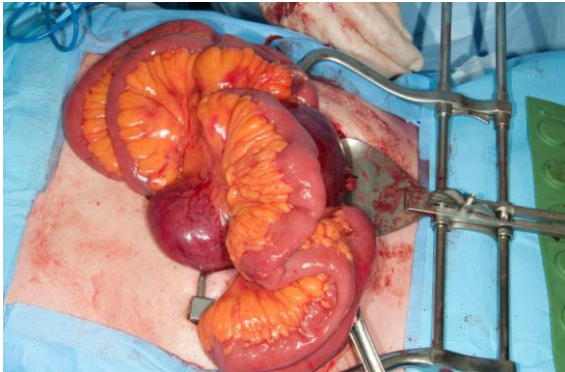

1B

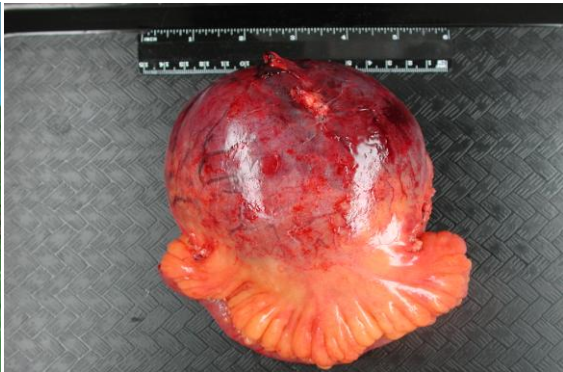

Supplement: MOESM1 [file 9565736]
